# Supplementary material for: Downregulation of the enhancer of zeste homolog 1 transcriptional factor predicts poor prognosis of triple-negative breast cancer patients
Source: PeerJ. 2022 Jul 12;10:e13708. doi: 10.7717/peerj.13708 (PMC9285492; doi:10.7717/peerj.13708)
Supplement: Supplemental Information 1 — Footnote: We used nucleus staining as an indicator of counting. Under a high-powered field of view (10 * 40), we continuously counted five fields, observed the proportion of positive cells and the intensity of nuclear staining in each field, and scored accordingly. (1) The proportion of positive cells (P) is scored as follows: zero point for 0% to 5%, one point for 6% to 25%, two points for 26% to 50%, three points for 51% to 75%, and four points for ≥76%. (2) The intensity (I) of cell nucleus staining is scored on a scale of 0 points for no cell staining, one point for mild cell staining, two points for moderate cell staining, and three points for strong positive staining. The final staining score is calculated by the following algorithm, staining score = P * I. Therefore, the lowest score is zero point, and the highest score is 12 points. [file peerj-10-13708-s001.xlsx]

## Sheet: Sheet1
Supplementary Table 1. Score of EZH1 immunohistochemical staining in each tissue
Chip ID	Number	Case number	EZH1 scores	Molecular subtypes
HBreD140DSu06	A01	J07A3054	8	HER2+
HBreD140DSu06	A02	J07A3055	4	HER2+
HBreD140DSu06	A04	J07A3057	2	Luminal
HBreD140DSu06	A05	J07A3058	4	Luminal
HBreD140DSu06	A06	J07A3059	4	HER2+
HBreD140DSu06	A07	J07A3060	6	Luminal
HBreD140DSu06	A08	J07A3061	0	Luminal
HBreD140DSu06	A09	J07A3062	6	Luminal
HBreD140DSu06	A10	J07A3063	6	HER2+
HBreD140DSu06	A11	J07A3064	6	Luminal
HBreD140DSu06	A12	J07A3065	2	Luminal
HBreD140DSu06	A13	J07A3066	6	Luminal
HBreD140DSu06	A14	J07A3067	6	Luminal
HBreD140DSu06	B01	J07A3070	6	HER2+
HBreD140DSu06	B02	J07A3071	6	Luminal
HBreD140DSu06	B03	J07A3072	6	HER2+
HBreD140DSu06	B05	J07A3074	6	Luminal
HBreD140DSu06	B06	J07A3075	6	Luminal
HBreD140DSu06	B07	J07A3076	6	Luminal
HBreD140DSu06	B09	J07A3078	8	Luminal
HBreD140DSu06	B10	J07A3079	6	Luminal
HBreD140DSu06	B11	J07A3080	6	Luminal
HBreD140DSu06	B16	J07A3085	4	Luminal
HBreD140DSu06	C01	J07A3086	8	Luminal
HBreD140DSu06	C02	J07A3087	6	Luminal
HBreD140DSu06	C04	J07A3089	4	Luminal
HBreD140DSu06	C05	J07A3090	6	Luminal
HBreD140DSu06	C06	J07A3091	6	HER2+
HBreD140DSu06	C07	J07A3092	4	Luminal
HBreD140DSu06	C09	J07A3094	6	Luminal
HBreD140DSu06	C10	J07A3095	6	Luminal
HBreD140DSu06	C11	J07A3096	6	Luminal
HBreD140DSu06	C12	J07A3097	4	Luminal
HBreD140DSu06	C13	J07A3098	4	Luminal
HBreD140DSu06	C14	J07A3099		Luminal
HBreD140DSu06	C15	J07A3100	4	Luminal
HBreD140DSu06	C16	J07A3101	2	Luminal
HBreD140DSu06	D02	J07A3103	6	Luminal
HBreD140DSu06	D04	J07A3105	4	HER2+
HBreD140DSu06	D05	J07A3106	6	Luminal
HBreD140DSu06	D06	J07A3107	6	Luminal
HBreD140DSu06	D07	J07A3108	4	Luminal
HBreD140DSu06	D08	J07A3109	6	Luminal
HBreD140DSu06	D10	J07A3111	6	Luminal
HBreD140DSu06	D11	J07A3112		Luminal
HBreD140DSu06	D12	J07A3113	6	Luminal
HBreD140DSu06	D13	J07A3114	8	Luminal
HBreD140DSu06	E02	J07A3119	6	Luminal
HBreD140DSu06	E03	J07A3120	6	HER2+
HBreD140DSu06	E04	J07A3121	6	Luminal
HBreD140DSu06	E05	J07A3122	8	Luminal
HBreD140DSu06	E06	J07A3123	6	Luminal
HBreD140DSu06	E07	J07A3124	4	Luminal
HBreD140DSu06	E08	J07A3125	6	Luminal
HBreD140DSu06	E10	J07A3127	2	Luminal
HBreD140DSu06	E11	J07A3128	4	Luminal
HBreD140DSu06	E12	J07A3129	4	Luminal
HBreD140DSu06	E13	J07A3130	6	Luminal
HBreD140DSu06	E15	J07A3132	6	Luminal
HBreD140DSu06	E16	J07A3133	6	Luminal
HBreD140DSu06	F02	J07A3135	2	Luminal
HBreD140DSu06	F03	J07A3136	4	Luminal
HBreD140DSu06	F04	J07A3137	4	Luminal
HBreD140DSu06	F05	J07A3138	4	HER2+
HBreD140DSu06	F06	J07A3139	4	Luminal
HBreD140DSu06	F07	J07A3140	2	Luminal
HBreD140DSu06	F08	J07A3141	4	HER2+
HBreD140DSu06	F09	J07A3142	0	Luminal
HBreD140DSu06	F10	J07A3143	6	Luminal
HBreD140DSu06	F13	J07A3146	2	Luminal
HBreD140DSu06	F14	J07A3147	6	Luminal
HBreD140DSu06	F16	J07A3149	0	Luminal
HBreD140DSu06	G01	J07A3150	6	Luminal
HBreD140DSu06	G03	J07A3152	4	HER2+
HBreD140DSu06	G04	J07A3153	6	Luminal
HBreD140DSu06	G05	J07A3154	4	Luminal
HBreD140DSu06	G06	J07A3155	4	Luminal
HBreD140DSu06	G07	J07A3156	4	Luminal
HBreD140DSu06	G08	J07A3157	6	Luminal
HBreD140DSu06	G10	J07A3159	4	HER2+
HBreD140DSu06	G11	J07A3160	6	Luminal
HBreD140DSu06	G12	J07A3161	4	Luminal
HBreD140DSu06	G13	J07A3162	4	Luminal
HBreD140DSu06	G15	J07A3164	4	Luminal
HBreD140DSu06	G16	J07A3165	4	Luminal
HBreD140DSu06	H01	J07A3166	4	Luminal
HBreD140DSu06	H02	J07A3167	6	Luminal
HBreD140DSu06	H03	J07A3168	4	Luminal
HBreD140DSu06	H04	J07A3169	4	HER2+
HBreD140DSu06	H05	J07A3170	2	Luminal
HBreD140DSu06	H07	J07A3172	6	HER2+
HBreD140DSu06	H08	J07A3173	6	Luminal
HBreD140DSu06	H09	J07A3174	6	Luminal
HBreD140DSu06	H12	J07A3177	6	Luminal
HBreD140DSu06	H13	J07A3178	4	Luminal
HBreD140DSu06	H14	J07A3179	8	Luminal
HBreD140DSu06	H15	J07A3180	6	Luminal
HBreD140DSu06	I03	J07A3184	6	Luminal
HBreD140DSu06	I04	J07A3185	6	Luminal
HBreD140DSu06	I05	J07A3186	6	Luminal
HBreD140DSu06	I06	J07A3187	6	Luminal
HBreD140DSu06	I07	J07A3188	6	Luminal
HBreD140DSu06	I08	J07A3189	4	Luminal
HBreD140DSu06	I09	J07A3190	6	Luminal
HBreD140DSu06	I10	J07A3191	4	Luminal
HBreD140DSu06	I11	J07A3192	4	Luminal
HBreD140DSu06	I12	J07A3193	8	Luminal
HBreD140DSu06	A03	J07A3056	0	TNBC
HBreD140DSu06	A16	J07A3069	4	TNBC
HBreD140DSu06	B04	J07A3073	0	TNBC
HBreD140DSu06	B08	J07A3077	2	TNBC
HBreD140DSu06	B12	J07A3081	2	TNBC
HBreD140DSu06	B13	J07A3082	4	TNBC
HBreD140DSu06	B14	J07A3083	2	TNBC
HBreD140DSu06	B15	J07A3084	0	TNBC
HBreD140DSu06	C03	J07A3088	2	TNBC
HBreD140DSu06	D01	J07A3102	2	TNBC
HBreD140DSu06	D03	J07A3104	2	TNBC
HBreD140DSu06	D09	J07A3110	2	TNBC
HBreD140DSu06	D14	J07A3115	2	TNBC
HBreD140DSu06	D15	J07A3116	2	TNBC
HBreD140DSu06	D16	J07A3117	0	TNBC
HBreD140DSu06	E09	J07A3126	2	TNBC
HBreD140DSu06	E14	J07A3131	2	TNBC
HBreD140DSu06	F01	J07A3134		TNBC
HBreD140DSu06	F11	J07A3144	6	TNBC
HBreD140DSu06	F12	J07A3145	2	TNBC
HBreD140DSu06	F15	J07A3148	4	TNBC
HBreD140DSu06	G02	J07A3151	0	TNBC
HBreD140DSu06	G09	J07A3158	2	TNBC
HBreD140DSu06	G14	J07A3163	4	TNBC
HBreD140DSu06	H06	J07A3171	4	TNBC
HBreD140DSu06	H10	J07A3175	2	TNBC
HBreD140DSu06	H11	J07A3176	2	TNBC
HBreD140DSu06	H16	J07A3181	0	TNBC
HBreD140DSu06	I02	J07A3183	4	TNBC
HBreD140DSu06	A15	J07A3068	6	NA
HBreD140DSu06	C08	J07A3093	2	NA
HBreD140DSu06	E01	J07A3118	2	NA
HBreD140DSu06	I01	J07A3182	2	NA
HBreD050Bc01	E07	J07A3501	6	HER2+
HBreD050Bc01	A01	J07A3466	4	TNBC
HBreD050Bc01	A03	J07A3467	8	TNBC
HBreD050Bc01	A05	J07A3468	2	TNBC
HBreD050Bc01	A07	J07A3469	2	TNBC
HBreD050Bc01	A09	J07A3470	6	TNBC
HBreD050Bc01	B01	J07A3471	0	TNBC
HBreD050Bc01	B03	J07A3472	4	TNBC
HBreD050Bc01	B05	J07A3473	4	TNBC
HBreD050Bc01	B07	J07A3474	4	TNBC
HBreD050Bc01	B09	J07A3475	6	TNBC
HBreD050Bc01	C01	J07A3465	2	TNBC
HBreD050Bc01	C02	J07A3476	2	TNBC
HBreD050Bc01	C03	J07A3477	2	TNBC
HBreD050Bc01	C04	J07A3478	2	TNBC
HBreD050Bc01	C05	J07A3479	2	TNBC
HBreD050Bc01	C06	J07A3480	2	TNBC
HBreD050Bc01	C07	J07A3481	2	TNBC
HBreD050Bc01	C08	J07A3482	2	TNBC
HBreD050Bc01	C10	J07A3484	2	TNBC
HBreD050Bc01	D01	J07A3485	1	TNBC
HBreD050Bc01	D02	J07A3486	2	TNBC
HBreD050Bc01	D03	J07A3487	2	TNBC
HBreD050Bc01	D04	J07A3488	2	TNBC
HBreD050Bc01	D05	J07A3489	2	TNBC
HBreD050Bc01	D06	J07A3490	4	TNBC
HBreD050Bc01	D07	J07A3491	2	TNBC
HBreD050Bc01	D08	J07A3492	2	TNBC
HBreD050Bc01	D09	J07A3493	2	TNBC
HBreD050Bc01	D10	J07A3494	2	TNBC
HBreD050Bc01	E01	J07A3495	2	TNBC
HBreD050Bc01	E02	J07A3496	2	TNBC
HBreD050Bc01	E03	J07A3497	2	TNBC
HBreD050Bc01	E04	J07A3498	4	TNBC
HBreD050Bc01	E05	J07A3499	0	TNBC
HBreD050Bc01	E06	J07A3500	2	TNBC
HBreD050Bc01	E08	J07A3502	2	TNBC
HBreD050Bc01	E09	J07A3503	2	TNBC
HBreD050Bc01	E10	J07A3504	4	TNBC
HBreD050Bc01	C09	J07A3483	1	NA
Footnote: We used nucleus staining as an indicator of counting. Under a high-powered field of view (10*40), we continuously counted five fields, observed the proportion of positive cells and the intensity of nuclear staining in each field, and scored accordingly. (1) The proportion of positive cells (P) is scored as follows: zero point for 0% to 5%, one point for 6% to 25%, two points for 26% to …
