# Supplementary material for: Downregulation of the enhancer of zeste homolog 1 transcriptional factor predicts poor prognosis of triple-negative breast cancer patients
Source: PeerJ. 2022 Jul 12;10:e13708. doi: 10.7717/peerj.13708 (PMC9285492; doi:10.7717/peerj.13708)
Supplement: Supplemental Information 2 [file peerj-10-13708-s002.xlsx]

## Sheet: Sheet1
TMA	ID	Patient ID	Cacner~1/Normal~0	TNBC~1/HER2~2/Luminal~3	Normal~0/TNBC~1/non-TNBC~2	TNBC~1/non-TNBC~0	EZH1 score	Molecular subtype	HER2 (Positive~1/Negative~0)	ER (Positive~1/Negative~0)	PR (Positive~1/Negative~0	Age (≤50~0, ＞50~1)	Age	Histological grade (II~1，II-III~2，III~3)	Vascular cancer thrombus or nerve invasion	Lymph node metastasis (yes~1, no~0)	T	N	TNM stage (I~1, II~2, III~3)	AJCC (6th edition) clinical stage
HBreD140DSu06	A08	J07A3061	1	3	2	0	0	Luminal	0	1	0	1	55	1	0	1	2	2	3	3A
HBreD140DSu06	F09	J07A3142	1	3	2	0	0	Luminal	0	1	1	0	29	2	0	0	2	0	2	2A
HBreD140DSu06	F16	J07A3149	1	3	2	0	0	Luminal	0	1	1	0	50	1	0	0	2	0	2	2A
HBreD140DSu06	A03	J07A3056	1	1	1	1	0	TNBC	0	0	0	0	39	2	0	1	2	3	3	3C
HBreD140DSu06	B04	J07A3073	1	1	1	1	0	TNBC	0	0	0	1	70	1	0	1	1	2	3	3A
HBreD140DSu06	B15	J07A3084	1	1	1	1	0	TNBC	0	0	0	0	32	1	0	0	1	0	1	1
HBreD140DSu06	D16	J07A3117	1	1	1	1	0	TNBC	0	0	0	1	69	1	0	0	2	0	2	2A
HBreD140DSu06	G02	J07A3151	1	1	1	1	0	TNBC	0	0	0	0	41	2	0	1	2	2	3	3A
HBreD140DSu06	H16	J07A3181	1	1	1	1	0	TNBC	0	0	0	1	64	1	0	0	2	0	2	2A
HBreD050Bc01	B01	J07A3471	1	1	1	1	0	TNBC	0	0	0	0	42	3	1	0	2	0	2	2A
HBreD050Bc01	E05	J07A3499	1	1	1	1	0	TNBC	0	0	0	1	59	3	1	1	2	2	3	3A
HBreD050Bc01	D01	J07A3485	1	1	1	1	1	TNBC	0	0	0	0	48	3	1	0	1	0	1	1A
HBreD050Bc01	C09	J07A3483	1	-	-	-	1	NA	-	0	0	0	50	2	0	0	1	0	1	1A
HBreD140DSu06	A04	J07A3057	1	3	2	0	2	Luminal	0	1	1	1	60	1	1	1	1	1	2	2A
HBreD140DSu06	A12	J07A3065	1	3	2	0	2	Luminal	0	1	1	1	58	1	1	0	2	0	2	2A
HBreD140DSu06	C16	J07A3101	1	3	2	0	2	Luminal	0	0	1	1	53	2	1	1	2	2	3	3A
HBreD140DSu06	E10	J07A3127	1	3	2	0	2	Luminal	0	1	1	1	82	1	0	0	2	0	2	2A
HBreD140DSu06	F02	J07A3135	1	3	2	0	2	Luminal	0	1	1	1	64	1	0	1	2	1	2	2B
HBreD140DSu06	F07	J07A3140	1	3	2	0	2	Luminal	0	1	1	1	80	1	0	0	2	0	2	2A
HBreD140DSu06	F13	J07A3146	1	3	2	0	2	Luminal	0	1	0	1	68	1	0	0	1	0	1	1
HBreD140DSu06	H05	J07A3170	1	3	2	0	2	Luminal	0	1	1	0	50	1	1	0	2	0	2	2A
HBreD140DSu06	B08	J07A3077	1	1	1	1	2	TNBC	0	0	0	1	58	1	0	0	2	0	2	2A
HBreD140DSu06	B12	J07A3081	1	1	1	1	2	TNBC	0	0	0	1	59	1	0	0	1	0	1	1
HBreD140DSu06	B14	J07A3083	1	1	1	1	2	TNBC	0	0	0	0	42	3	0	0	2	0	2	2A
HBreD140DSu06	C03	J07A3088	1	1	1	1	2	TNBC	0	0	0	1	68	1	0	0	2	0	2	2A
HBreD140DSu06	D01	J07A3102	1	1	1	1	2	TNBC	0	0	0	0	46	1	0	0	1	0	1	1
HBreD140DSu06	D03	J07A3104	1	1	1	1	2	TNBC	0	0	0	0	40	2	0	0	1	0	1	1
HBreD140DSu06	D09	J07A3110	1	1	1	1	2	TNBC	0	0	0	1	63	2	0	1	1	2	3	3A
HBreD140DSu06	D14	J07A3115	1	1	1	1	2	TNBC	0	0	0	0	49	1	0	1	2	2	3	3A
HBreD140DSu06	D15	J07A3116	1	1	1	1	2	TNBC	0	0	0	1	54	3	1	1	3	2	3	3A
HBreD140DSu06	E09	J07A3126	1	1	1	1	2	TNBC	0	0	0	0	34	1	1	1	1	3	3	3C
HBreD140DSu06	E14	J07A3131	1	1	1	1	2	TNBC	0	0	0	1	53	2	0	0	1	0	1	1
HBreD140DSu06	F12	J07A3145	1	1	1	1	2	TNBC	0	0	0	0	32	1	0	0	1	0	1	1
HBreD140DSu06	G09	J07A3158	1	1	1	1	2	TNBC	0	0	0	1	67	2	0	1	1	3	3	3C
HBreD140DSu06	H10	J07A3175	1	1	1	1	2	TNBC	0	0	0	0	43	1	0	0	2	0	2	2A
HBreD140DSu06	H11	J07A3176	1	1	1	1	2	TNBC	0	0	0	0	42	1	0	0	1	0	1	1
HBreD140DSu06	C08	J07A3093	1	-	-	-	2	NA	-	-		0	48	1	0	0	1	0	1	1
HBreD140DSu06	E01	J07A3118	1	-	-	-	2	NA	-	0	0	0	49	1	0	1	1	2	3	3A
HBreD140DSu06	I01	J07A3182	1	-	-	-	2	NA	0	-		1	52	1	0	0	1	0	1	1
HBreD050Bc01	A05	J07A3468	1	1	1	1	2	TNBC	0	0	0	1	54	3	0	0	1	0	1	1A
HBreD050Bc01	A07	J07A3469	1	1	1	1	2	TNBC	0	0	0	1	51	3	1	1	1	1	2	2A
HBreD050Bc01	C01	J07A3465	1	1	1	1	2	TNBC	0	0	0	1	54		0	0	Tis	0		0期
HBreD050Bc01	C02	J07A3476	1	1	1	1	2	TNBC	0	0	0	1	52		0	0	Tis	0		0期
HBreD050Bc01	C03	J07A3477	1	1	1	1	2	TNBC	0	0	0	1	66		0	0	Tis	0		0期
HBreD050Bc01	C04	J07A3478	1	1	1	1	2	TNBC	0	0	0	0	41		0	0	Tis	0		0期
HBreD050Bc01	C05	J07A3479	1	1	1	1	2	TNBC	0	0	0	1	66	1	0	0	1	0	1	1A
HBreD050Bc01	C06	J07A3480	1	1	1	1	2	TNBC	0	0	0	0	46	1	1	0	1	0	1	1A
HBreD050Bc01	C07	J07A3481	1	1	1	1	2	TNBC	0	0	0	1	56	3	0	0	1	0	1	1A
HBreD050Bc01	C08	J07A3482	1	1	1	1	2	TNBC	0	0	0	1	51	1	0	0	1	0	1	1A
HBreD050Bc01	C10	J07A3484	1	1	1	1	2	TNBC	0	0	0	1	54	3	0	0	1	0	1	1A
HBreD050Bc01	D02	J07A3486	1	1	1	1	2	TNBC	0	0	0	1	54	3	0	0	1	0	1	1A
HBreD050Bc01	D03	J07A3487	1	1	1	1	2	TNBC	0	0	0	0	31	3	0	0	2	0	2	2A
HBreD050Bc01	D04	J07A3488	1	1	1	1	2	TNBC	0	0	0	1	58	2	1	0	2	0	2	2A
HBreD050Bc01	D05	J07A3489	1	1	1	1	2	TNBC	0	0	0	1	65	3	0	0	2	0	2	2A
HBreD050Bc01	D07	J07A3491	1	1	1	1	2	TNBC	0	0	0	0	45	1	0	0	3	0	2	2B
HBreD050Bc01	D08	J07A3492	1	1	1	1	2	TNBC	0	0	0	1	54	1	1	1	2	1	2	2B
HBreD050Bc01	D09	J07A3493	1	1	1	1	2	TNBC	0	0	0	1	84	3	1	1	2	1	2	2B
HBreD050Bc01	D10	J07A3494	1	1	1	1	2	TNBC	0	0	0	1	59	2	0	0	T1-T3	0	2	1-2
HBreD050Bc01	E01	J07A3495	1	1	1	1	2	TNBC	0	0	0	1	61	1	1	1	3	1	3	3A
HBreD050Bc01	E02	J07A3496	1	1	1	1	2	TNBC	0	0	0	0	41	3	1	1	1	2	3	3A
HBreD050Bc01	E03	J07A3497	1	1	1	1	2	TNBC	0	0	0	1	59	3	1	1	1	2	3	3A
HBreD050Bc01	E06	J07A3500	1	1	1	1	2	TNBC	0	0	0	1	59	2	0	0	4	0	3	3B
HBreD050Bc01	E08	J07A3502	1	1	1	1	2	TNBC	0	0	0	1	53	3	1	1	3	3	3	3C
HBreD050Bc01	E09	J07A3503	1	1	1	1	2	TNBC	0	0	0	1	68	2	1	1	2	3	3	3C
HBreD140DSu06	A02	J07A3055	1	2	2	0	4	HER2+	1	1	1	1	51	1	0	0	2	0	2	2A
HBreD140DSu06	A05	J07A3058	1	3	2	0	4	Luminal	0	1	0	1	55	1	0	0	1	0	1	1
HBreD140DSu06	A06	J07A3059	1	2	2	0	4	HER2+	1	1	1	1	65	1	0	1	2	1	2	2B
HBreD140DSu06	B16	J07A3085	1	3	2	0	4	Luminal	0	1	1	0	50	1	0	1	2	2	3	3A
HBreD140DSu06	C04	J07A3089	1	3	2	0	4	Luminal	0	1	1	1	87	1	0	1	2	1	2	2B
HBreD140DSu06	C07	J07A3092	1	3	2	0	4	Luminal	0	1	0	1	52	1	0	0	2	0	2	2A
HBreD140DSu06	C12	J07A3097	1	3	2	0	4	Luminal	0	1	1	1	72	1	0	0	1	0	1	1
HBreD140DSu06	C13	J07A3098	1	3	2	0	4	Luminal	0	1	0	1	54	1	0	0	2	0	2	2A
HBreD140DSu06	C15	J07A3100	1	3	2	0	4	Luminal	0	1	1	1	52	1	0	1	2	2	3	3A
HBreD140DSu06	D04	J07A3105	1	2	2	0	4	HER2+	1	1	0	1	54	1	0	0	2	0	2	2A
HBreD140DSu06	D07	J07A3108	1	3	2	0	4	Luminal	0	1	1	1	67	2	0	0	2	0	2	2A
HBreD140DSu06	E07	J07A3124	1	3	2	0	4	Luminal	0	1	1	0	40	2	0	1	1	2	3	3A
HBreD140DSu06	E11	J07A3128	1	3	2	0	4	Luminal	0	0	1	1	62	2	0	1	2	2	3	3A
HBreD140DSu06	E12	J07A3129	1	3	2	0	4	Luminal	0	1	1	1	62	1	0	0	1	0	1	1
HBreD140DSu06	F03	J07A3136	1	3	2	0	4	Luminal	0	0	1	1	64	3	0	0	2	0	2	2A
HBreD140DSu06	F04	J07A3137	1	3	2	0	4	Luminal	0	1	1	0	43	1	0	0	2	0	2	2A
HBreD140DSu06	F05	J07A3138	1	2	2	0	4	HER2+	1	0	0	1	54	1	0	1	2	2	3	3A
HBreD140DSu06	F06	J07A3139	1	3	2	0	4	Luminal	0	1	1	0	49	2	0	0	2	0	2	2A
HBreD140DSu06	F08	J07A3141	1	2	2	0	4	HER2+	1	1	1	0	38	1	0	1	2	2	3	3A
HBreD140DSu06	G03	J07A3152	1	2	2	0	4	HER2+	1	0	0	1	55	1	0	1	1	1	2	2A
HBreD140DSu06	G05	J07A3154	1	3	2	0	4	Luminal	0	1	0	0	47	1	0	1	2	1	2	2B
HBreD140DSu06	G06	J07A3155	1	3	2	0	4	Luminal	0	1	1	1	67	1	1	1	2	2	3	3A
HBreD140DSu06	G07	J07A3156	1	3	2	0	4	Luminal	0	1	0	1	56	2	0	0	1	0	1	1
HBreD140DSu06	G10	J07A3159	1	2	2	0	4	HER2+	1	0	0	1	52	2	1	1	2	2	3	3A
HBreD140DSu06	G12	J07A3161	1	3	2	0	4	Luminal	0	1	1	1	66	1	0	1	2	2	3	3A
HBreD140DSu06	G13	J07A3162	1	3	2	0	4	Luminal	0	1	0	1	56	1	0	1	1	1	2	2A
HBreD140DSu06	G15	J07A3164	1	3	2	0	4	Luminal	0	1	1	1	52	2	0	1	2	1	2	2B
HBreD140DSu06	G16	J07A3165	1	3	2	0	4	Luminal	0	1	1	1	53	1	0	1	2	1	2	2B
HBreD140DSu06	H01	J07A3166	1	3	2	0	4	Luminal	0	1	0	0	47	1	0	0	1	0	1	1
HBreD140DSu06	H03	J07A3168	1	3	2	0	4	Luminal	0	1	0	1	55	1	1	1	2	2	3	3A
HBreD140DSu06	H04	J07A3169	1	2	2	0	4	HER2+	1	1	0	1	52	1	0	0	2	0	2	2A
HBreD140DSu06	H13	J07A3178	1	3	2	0	4	Luminal	0	1	1	1	51	1	0	1	2	2	3	3A
HBreD140DSu06	I08	J07A3189	1	3	2	0	4	Luminal	0	1	1	0	49	1	0	0	1	0	1	1
HBreD140DSu06	I10	J07A3191	1	3	2	0	4	Luminal	0	1	1	1	67	1	0	1	1	2	3	3A
HBreD140DSu06	I11	J07A3192	1	3	2	0	4	Luminal	0	1	1	1	55	2	0	0	1	0	1	1
HBreD140DSu06	A16	J07A3069	1	1	1	1	4	TNBC	0	0	0	0	48	1	0	1	2	2	3	3A
HBreD140DSu06	B13	J07A3082	1	1	1	1	4	TNBC	0	0	0	1	59	2	0	0	2	0	2	2A
HBreD140DSu06	F15	J07A3148	1	1	1	1	4	TNBC	0	0	0	1	55	2	0	1	2	2	3	3A
HBreD140DSu06	G14	J07A3163	1	1	1	1	4	TNBC	0	0	0	0	49	1	0	0	1	0	1	1
HBreD140DSu06	H06	J07A3171	1	1	1	1	4	TNBC	0	0	0	0	50	2	1	1	2	3	3	3C
HBreD140DSu06	I02	J07A3183	1	1	1	1	4	TNBC	0	0	0	0	47	2	0	0	2	0	2	2A
HBreD050Bc01	A01	J07A3466	1	1	1	1	4	TNBC	0	0	0	0	48	1	0	0	1	0	1	1A
HBreD050Bc01	B03	J07A3472	1	1	1	1	4	TNBC	0	0	0	1	51	3	0	0	2	0	2	2A
HBreD050Bc01	B05	J07A3473	1	1	1	1	4	TNBC	0	0	0	1	69	1	1	1	1	1	2	2A
HBreD050Bc01	B07	J07A3474	1	1	1	1	4	TNBC	0	0	0	0	32	1	0	0	T1-T3	0	2	1-2
HBreD050Bc01	D06	J07A3490	1	1	1	1	4	TNBC	0	0	0	1	66	1	NA	0	2	0	2	2A
HBreD050Bc01	E04	J07A3498	1	1	1	1	4	TNBC	0	0	0	0	43	2	1	1	3	1	3	3A
HBreD050Bc01	E10	J07A3504	1	1	1	1	4	TNBC	0	0	0	0	28	3	1	1	3	1	3	3A
HBreD140DSu06	A07	J07A3060	1	3	2	0	6	Luminal	0	1	0	0	47	1	0	1	2	2	3	3A
HBreD140DSu06	A09	J07A3062	1	3	2	0	6	Luminal	0	1	1	1	60	1	0	1	2	3	3	3C
HBreD140DSu06	A10	J07A3063	1	2	2	0	6	HER2+	1	1	1	0	41	1	0	0	1	0	1	1
HBreD140DSu06	A11	J07A3064	1	3	2	0	6	Luminal	0	1	0	1	75	1	0	1	2	1	2	2B
HBreD140DSu06	A13	J07A3066	1	3	2	0	6	Luminal	0	1	0	0	41	1	0	1	1	2	3	3A
HBreD140DSu06	A14	J07A3067	1	3	2	0	6	Luminal	0	1	1	1	66	1	0	0	2	0	2	2A
HBreD140DSu06	B01	J07A3070	1	2	2	0	6	HER2+	1	1	1	1	72	1	0	1	1	1	2	2A
HBreD140DSu06	B02	J07A3071	1	3	2	0	6	Luminal	0	1	0	1	56	2	1	0	1	0	1	1
HBreD140DSu06	B03	J07A3072	1	2	2	0	6	HER2+	1	1	1	0	49	2	0	1	2	2	3	3A
HBreD140DSu06	B05	J07A3074	1	3	2	0	6	Luminal	0	1	1	0	43	1	0	1	2	3	3	3C
HBreD140DSu06	B06	J07A3075	1	3	2	0	6	Luminal	0	0	1	1	84	2	0	0	2	0	2	2A
HBreD140DSu06	B07	J07A3076	1	3	2	0	6	Luminal	0	1	1	1	74	1	0	0	1	0	1	1
HBreD140DSu06	B10	J07A3079	1	3	2	0	6	Luminal	0	1	1	1	60	1	1	1	1	2	3	3A
HBreD140DSu06	B11	J07A3080	1	3	2	0	6	Luminal	0	1	1	0	47	1	0	0	1	0	1	1
HBreD140DSu06	C02	J07A3087	1	3	2	0	6	Luminal	0	1	0	1	56	1	0	0	2	0	2	2A
HBreD140DSu06	C05	J07A3090	1	3	2	0	6	Luminal	0	1	1	0	43	1	1	0	1	0	1	1
HBreD140DSu06	C06	J07A3091	1	2	2	0	6	HER2+	1	1	0	1	56	1	0	0	2	0	2	2A
HBreD140DSu06	C09	J07A3094	1	3	2	0	6	Luminal	0	1	1	1	62	1	0	0	1	0	1	1
HBreD140DSu06	C10	J07A3095	1	3	2	0	6	Luminal	0	1	1	1	86	1	0	1	1	2	3	3A
HBreD140DSu06	C11	J07A3096	1	3	2	0	6	Luminal	0	1	0	0	49	1	0	1	2	1	2	2B
HBreD140DSu06	D02	J07A3103	1	3	2	0	6	Luminal	0	1	0	1	77	1	0	0	2	0	2	2A
HBreD140DSu06	D05	J07A3106	1	3	2	0	6	Luminal	0	1	1	1	52	1	0	0	1	0	1	1
HBreD140DSu06	D06	J07A3107	1	3	2	0	6	Luminal	0	1	0	0	49	2	0	0	2	0	2	2A
HBreD140DSu06	D08	J07A3109	1	3	2	0	6	Luminal	0	1	1	1	69	1	0	1	1	1	2	2A
HBreD140DSu06	D10	J07A3111	1	3	2	0	6	Luminal	0	1	1	1	68	1	0	0	2	0	2	2A
HBreD140DSu06	D12	J07A3113	1	3	2	0	6	Luminal	0	0	1	0	46	1	0	1	2	2	3	3A
HBreD140DSu06	E02	J07A3119	1	3	2	0	6	Luminal	0	1	1	0	44	1	0	1	1	2	3	3A
HBreD140DSu06	E03	J07A3120	1	2	2	0	6	HER2+	1	-	0	0	45	2	1	1	2	2	3	3A
HBreD140DSu06	E04	J07A3121	1	3	2	0	6	Luminal	0	1	1	1	81	3	0	0	2	0	2	2A
HBreD140DSu06	E06	J07A3123	1	3	2	0	6	Luminal	0	1	1	0	50	1	0	1	2	1	2	2B
HBreD140DSu06	E08	J07A3125	1	3	2	0	6	Luminal	0	1	1	1	65	2	0	1	2	1	2	2B
HBreD140DSu06	E13	J07A3130	1	3	2	0	6	Luminal	0	1	1	1	70	1	0	1	2	2	3	3A
HBreD140DSu06	E15	J07A3132	1	3	2	0	6	Luminal	0	1		0	48	1	0	0	2	0	2	2A
HBreD140DSu06	E16	J07A3133	1	3	2	0	6	Luminal	0	1	1	1	65	1	0	0	1	0	1	1
HBreD140DSu06	F10	J07A3143	1	3	2	0	6	Luminal	0	1	1	0	47	1	0	1	1	1	2	2A
HBreD140DSu06	F14	J07A3147	1	3	2	0	6	Luminal	0	1	1	0	50	1	0	1	2	1	2	2B
HBreD140DSu06	G01	J07A3150	1	3	2	0	6	Luminal	0	1	1	1	58	1	0	0	2	0	2	2A
HBreD140DSu06	G04	J07A3153	1	3	2	0	6	Luminal	0	0	1	0	49	2	0	0	2	0	2	2A
HBreD140DSu06	G08	J07A3157	1	3	2	0	6	Luminal	0	1	0	1	59	1	0	0	1	0	1	1
HBreD140DSu06	G11	J07A3160	1	3	2	0	6	Luminal	0	1	1	1	54	1	0	1	1	2	3	3A
HBreD140DSu06	H02	J07A3167	1	3	2	0	6	Luminal	0	1	1	1	62	1	0	0	1	0	1	1
HBreD140DSu06	H07	J07A3172	1	2	2	0	6	HER2+	1	0	0	1	56	3	0	0	1	0	1	1
HBreD140DSu06	H08	J07A3173	1	3	2	0	6	Luminal	0	1	0	0	44	2	1	0	1	0	1	1
HBreD140DSu06	H09	J07A3174	1	3	2	0	6	Luminal	0	1	0	1	56	2	0	0	2	0	2	2A
HBreD140DSu06	H12	J07A3177	1	3	2	0	6	Luminal	0	1	1	1	57	1	0	1	1	3	3	3C
HBreD140DSu06	H15	J07A3180	1	3	2	0	6	Luminal	0	1	1	0	40	1	0	1	1	1	2	2A
HBreD140DSu06	I03	J07A3184	1	3	2	0	6	Luminal	0	1	0	1	52	1	0	0	2	0	2	2A
HBreD140DSu06	I04	J07A3185	1	3	2	0	6	Luminal	0	1	0	1	63	2	0	1	1	2	3	3A
HBreD140DSu06	I05	J07A3186	1	3	2	0	6	Luminal	0	1	1	1	71	1	0	1	1	1	2	2A
HBreD140DSu06	I06	J07A3187	1	3	2	0	6	Luminal	0	1	1	1	75	2	0	0	2	0	2	2A
HBreD140DSu06	I07	J07A3188	1	3	2	0	6	Luminal	0	1	1	1	75	1	0	0	3	0	2	2B
HBreD140DSu06	I09	J07A3190	1	3	2	0	6	Luminal	0	1	0	0	41	2	0	0	2	0	2	2A
HBreD140DSu06	F11	J07A3144	1	1	1	1	6	TNBC	0	0	0	1	83	2	0	0	2	0	2	2A
HBreD140DSu06	A15	J07A3068	1	-	-	-	6	NA	-	0	0	1	62	1	0	1	2	2	3	3A
HBreD050Bc01	E07	J07A3501	1	2	2	0	6	HER2+	1	0	0	1	77	3	1	1	4	1	3	3B
HBreD050Bc01	A09	J07A3470	1	1	1	1	6	TNBC	0	0	0	0	43	1	1	1	1	1	2	2A
HBreD050Bc01	B09	J07A3475	1	1	1	1	6	TNBC	0	0	0	0	40	2	1	1	4	1	3	3B
HBreD140DSu06	A01	J07A3054	1	2	2	0	8	HER2+	1	1	1	1	56	1	0	0	1	0	1	1
HBreD140DSu06	B09	J07A3078	1	3	2	0	8	Luminal	0	1	1	1	55	1	0	1	2	3	3	3C
HBreD140DSu06	C01	J07A3086	1	3	2	0	8	Luminal	0	1	1	1	69	2	1	1	1	2	3	3A
HBreD140DSu06	D13	J07A3114	1	3	2	0	8	Luminal	0	-	1	0	43	1	0	0	2	0	2	2A
HBreD140DSu06	E05	J07A3122	1	3	2	0	8	Luminal	0	1	1	0	50	2	0	0	1	0	1	1
HBreD140DSu06	H14	J07A3179	1	3	2	0	8	Luminal	0	1	1	1	62	1	0	1	2	2	3	3A
HBreD140DSu06	I12	J07A3193	1	3	2	0	8	Luminal	0	1	1	1	52	2	0	1	1	2	3	3A
HBreD050Bc01	A03	J07A3467	1	1	1	1	8	TNBC	0	0	0	0	46	1	0	0	1	0	1	1A
HBreD140DSu06	C14	J07A3099	1	3	2	0	NA	Luminal	0	1	0	1	62	1	0	0	2	0	2	2A
HBreD140DSu06	D11	J07A3112	1	3	2	0	NA	Luminal	0	1	1	0	47	2	0	1	2	2	3	3A
HBreD140DSu06	F01	J07A3134	1	1	1	1	NA	TNBC	0	0	0	1	53	1	0	0	1	0	1	1
